# Supplementary material for: Race/Ethnicity and Economic Differences in Cost-Related Medication Underuse Among Insured Adults With Diabetes
Source: Oxford University Press journal article supplement (doi:10.2337/dc07-1341), 2008-01-28
Supplement: dc071341appendixi.doc [file dc071341appendixi.doc]

| **Appendix I. Odds ratios and CI for adjusted models for cost-related medication underuse 1 of 2, cont.** | |
| --- | --- |
| **All participants (n=5086)** | **Adjusted Odds Ratio (95% CI)** |
| **Race/Ethnicity** |  |
| White [reference] n=2452 |  |
| African American n=707 | 1.1 (0.8 - 1.4) |
| Latino n = 736 | 1.4 (1.1 - 2.0)* |
| API n = 782 | 0.7 (0.5 - 1.1) |
| Other n = 410 | 1.1 (0.7 - 1.6) |
| **Age (years)** |  |
| 18-44 | 4.6 (3.2 - 6.6)* |
| 45-64 | 2.8 (2.2 - 3.5)* |
| 65+ [reference] | --- |
| **Sex** |  |
| Female | 1.5 (1.2 - 1.8)* |
| Male [reference] | --- |
| **Education** |  |
| < High School | 0.9 (0.7 - 1.2) |
| High School Graduate | 1.1 (0.9 - 1.4) |
| Some college or higher [reference] | --- |
| **Annual Household Income** |  |
| < $25,000 | 3.2 (2.1 – 5.0)* |
| $25,000 to $49,999 | 2.4 (1.6 - 3.5)* |
| $50,000+ [reference] | --- |

| **Appendix I. Odds ratios and CI for unadjusted and adjusted models for cost-related medication underuse 2 of 2** | |
| --- | --- |
| **All participants (n=5086)** | **Adjusted Odds Ratio (95% CI)** |
| **Health Status** |  |
| excellent/very good [reference] | --- |
| good | 1.4 (1.0 - 1.8)* |
| fair/poor | 2.2 (1.6 - 2.9)* |
| **Has prescription drug benefit** |  |
| yes [reference] | --- |
| no | 1.5 (1.2 - 1.9)* |
| **Number of prescription medications** |  |
| 1-5 meds [reference] | --- |
| 6 + | 1.3 (1.1 - 1.6)* |
| **Ave. monthly out-of-pocket drug costs** |  |
| $50 or less per month [reference] | --- |
| $51 to $100 per month | 1.8 (1.4 - 2.3)* |
| $101 to $150 per month | 2.7 (2.0 - 3.6)* |
| > $150 per month | 4.6 (3.5 - 5.9)* |
| * Significant at p<0.05 | |
